# Supplementary material
Source: publisher site journal article supplement (https://www.dovepress.com/article/327825)
Supplement: Supplementary file 1 [file get_supplementary_file.php]

**Supplementary materials**


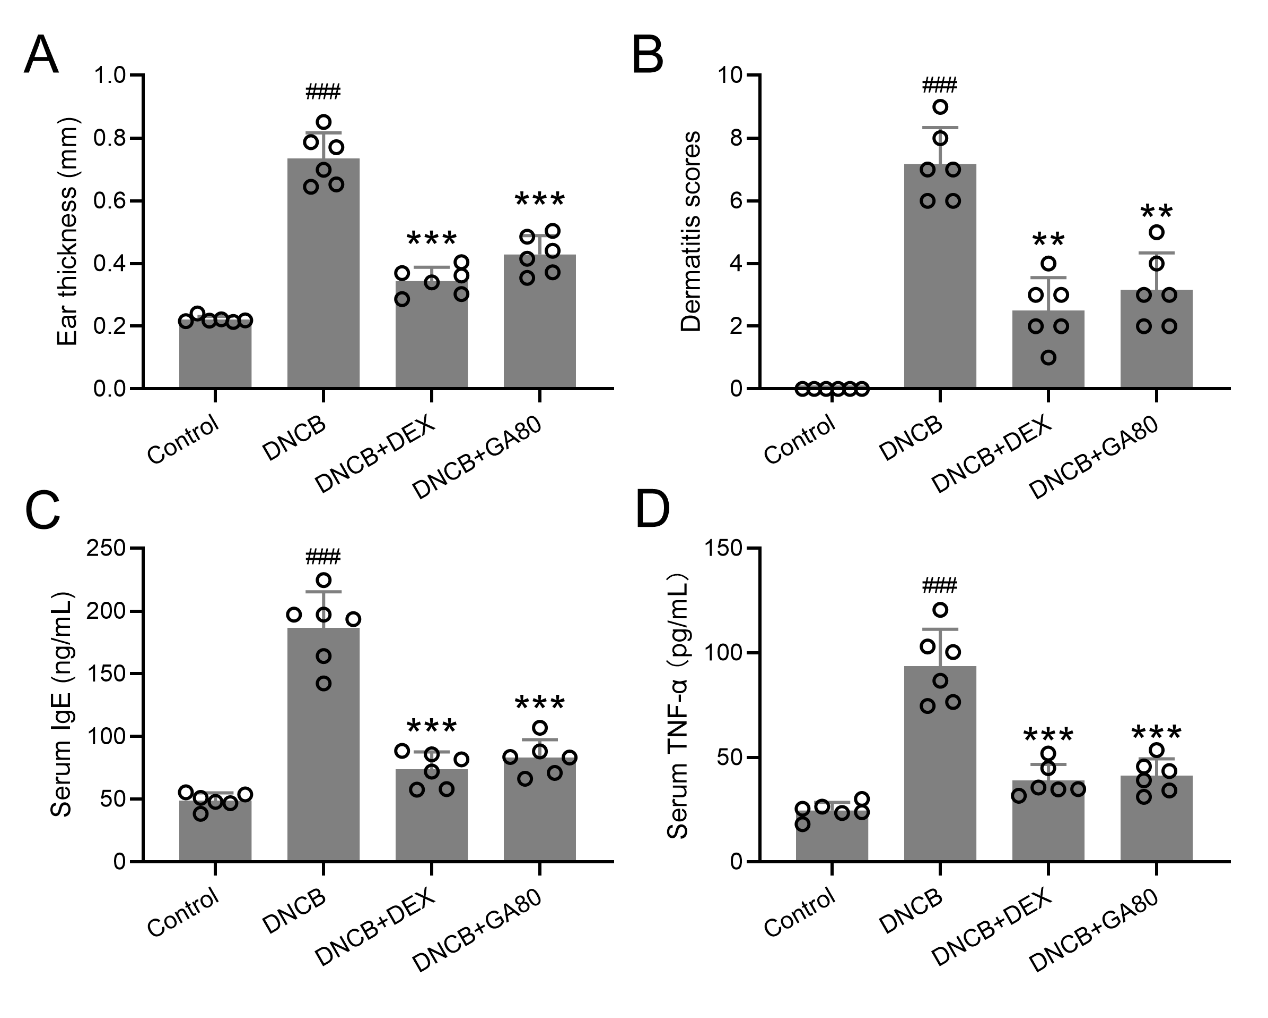


Figure S1. Comparison of gallic acid with positive control of dexamethasone. A, Comparisons of ear thickness at the end of experimental procedure. B, Effects of gallic acid on atopic dermatitis-like skin severity induced by DNCB. C and D, Effects of gallic acid on serum levels of IgE (C) and TNF-α (D) in atopic dermatitis-like mice. Mean ± SD was used to shown the data. ###p < 0.001 compared to control, **p < 0.01, ***p < 0.001 compared to DNCB group. One-way ANOVA followed Dunn's multiple comparisons test.


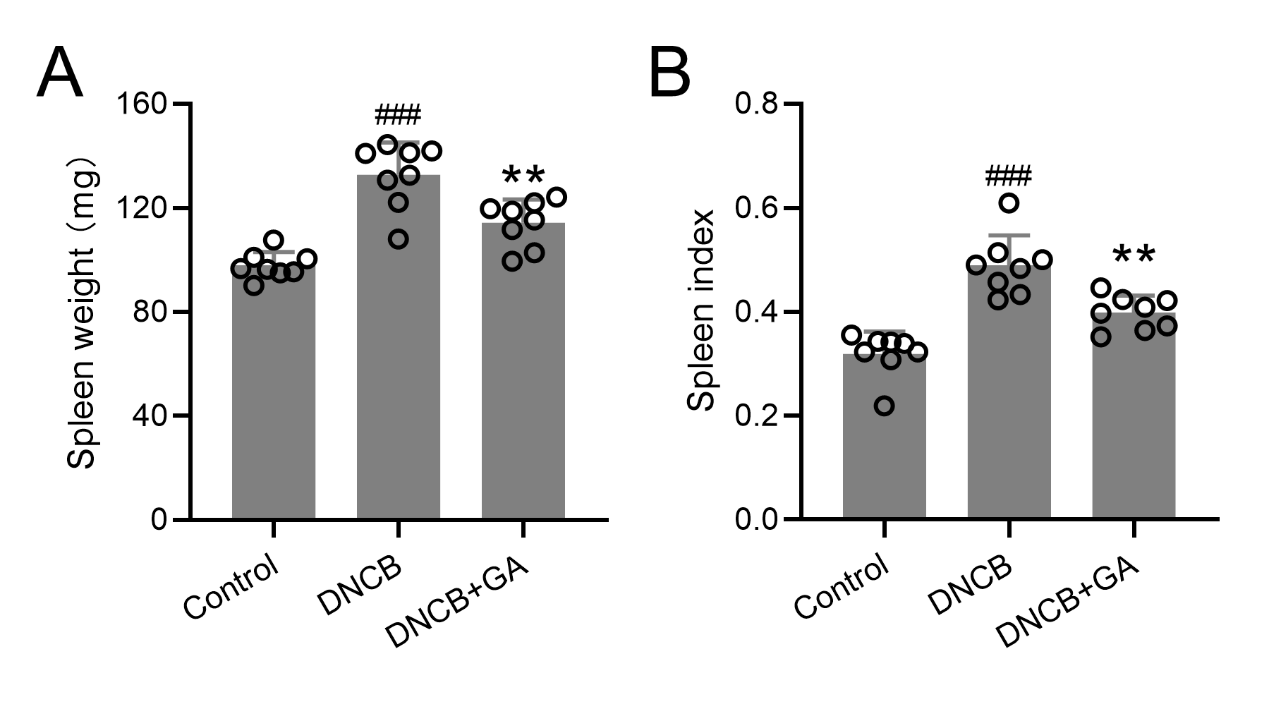


Figure S2. The spleens were excised on day 43 and the weight were compared (A) to calculate the spleen index (B). Mean ± SD was used to shown the data. ###p < 0.001 compared to control, **p < 0.01 compared to DNCB group. One-way ANOVA followed Dunn's multiple comparisons test.


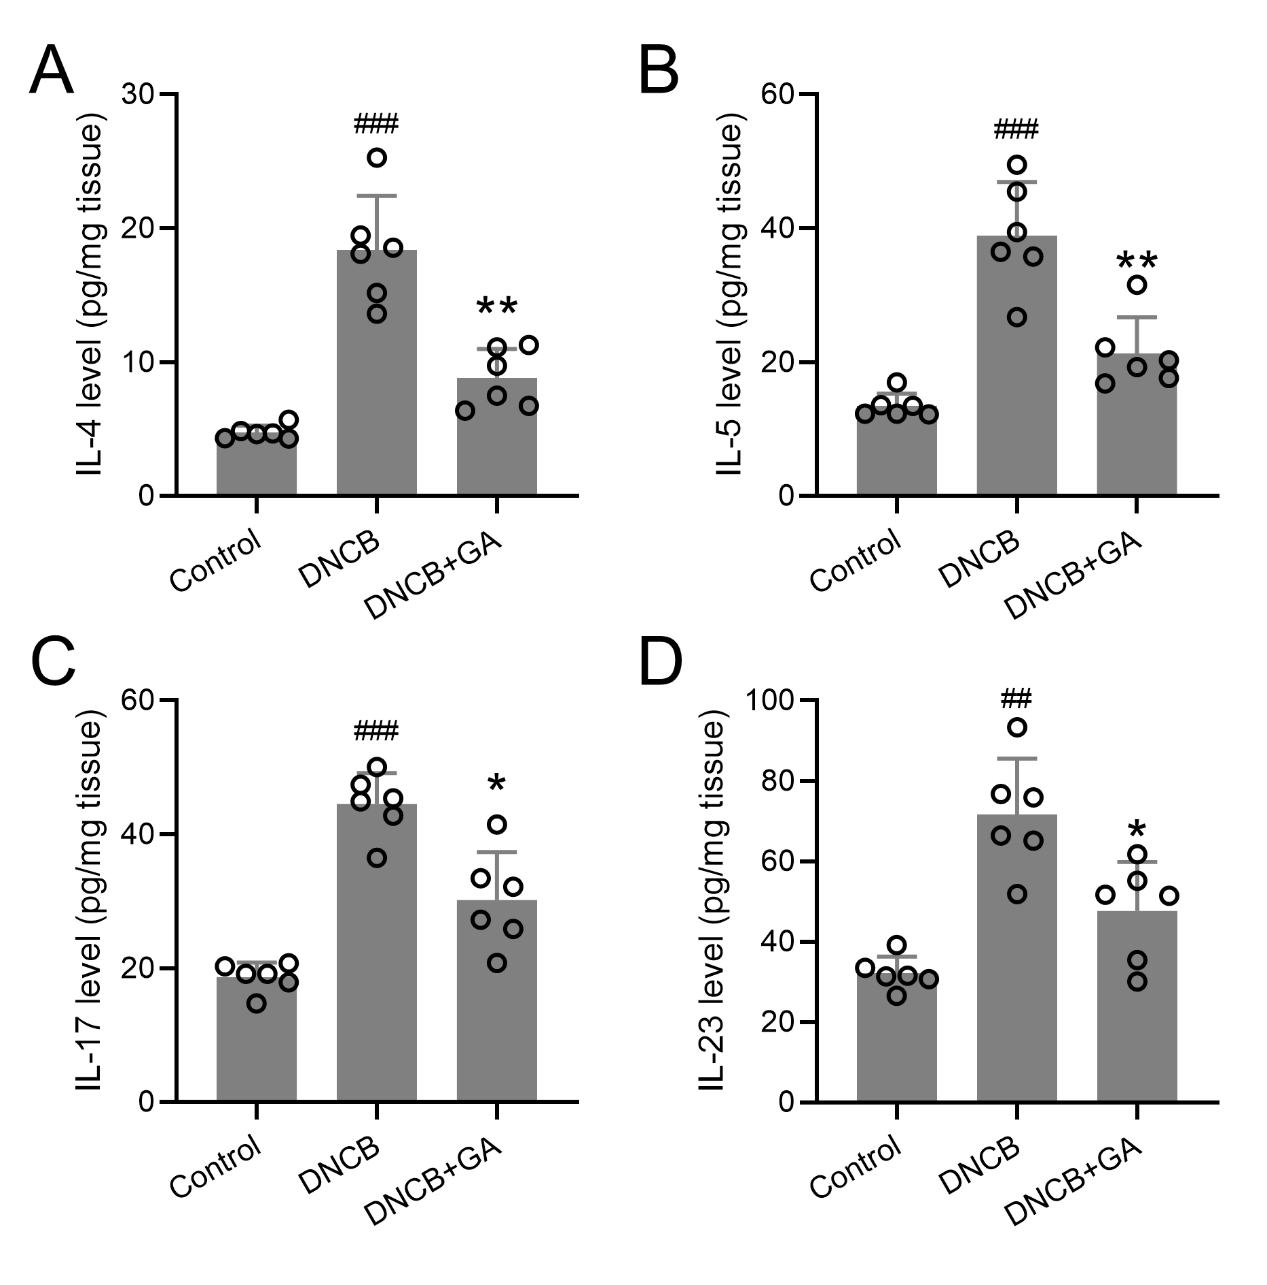


Figure S3. The ears were excised on day 43 and ELISA was used to measure the concentrations of IL-4 (A), IL-5 (B), IL-17 (C), IL-23 (D) in ear tissues. Mean ± SD was used to shown the data. ##p < 0.01, ###p < 0.001 compared to control, *p < 0.05, **p < 0.01 compared to DNCB group. One-way ANOVA followed Dunn's multiple comparisons test.


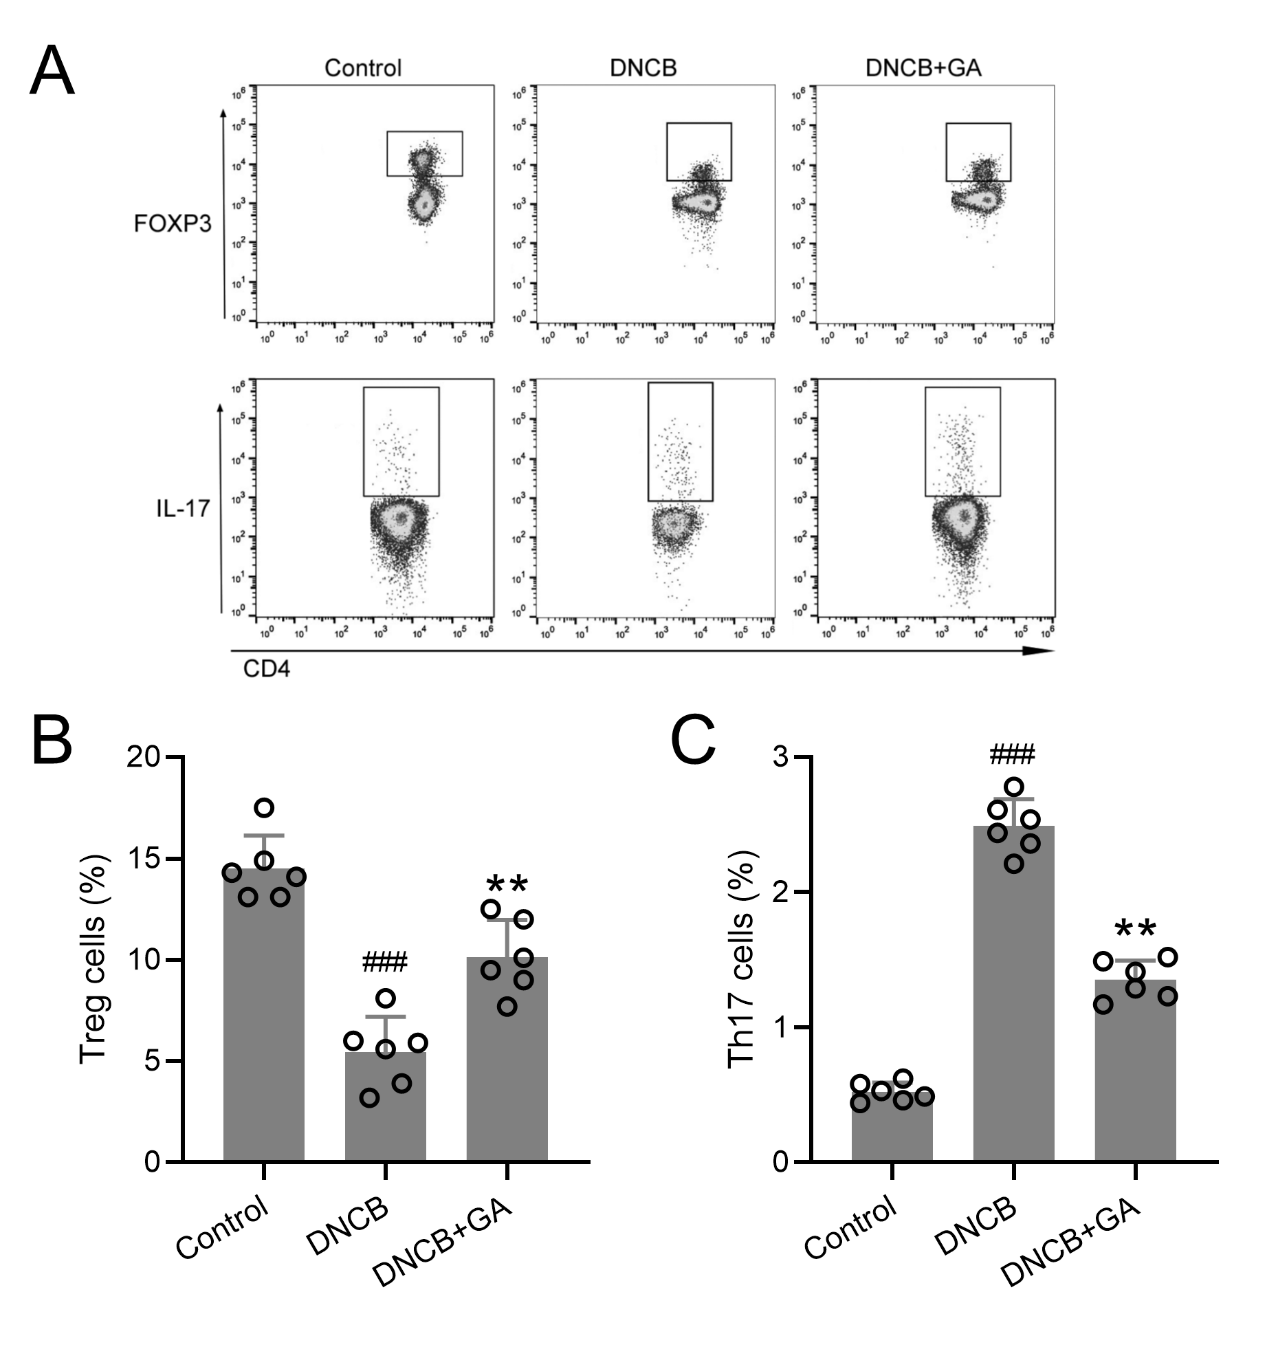


Figure S4. Effects of gallic acid on the Th17 and Treg cell ratios in spleens of DNCB induced atopic dermatitis-like mice. A, Representative flow cytometry dot plots for each group were shown, and ratios of Treg cells (B) and Th17 cells (C) were calculated and analyzed. Mean ± SD was used to shown the data. ###p < 0.001 compared to control, **p < 0.01 compared to DNCB group. One-way ANOVA followed Dunn's multiple comparisons test.

| Gene | Primer direction | Sequence  (5′--3′) |
| --- | --- | --- |
| TNF-α | Forward | CAGGCGGTGCCTATGTCTC |
| Reverse | CGATCACCCCGAAGTTCAGTAG |
| IL-4 | Forward | TACCAGGAGCCATATCCACGGATG |
| Reverse | TGTGGTGTTCTTCGTTGCTGTGAG |
| IFN-γ | Forward | TATCTGGAGGAACTGGCAAA |
| Reverse | ATCAGGTGTGATTCAATGACG |
| IL-17 | Forward | TCACTCCTGCTGATTCGGGT |
| Reverse | CTCAGTGCCACCTCCAGACT |
| IL-5 | Forward | CCTCATCCTCTTCGTTGCATCAGG |
| Reverse | TGATCCTCCTGCGTCCATCTGG |
| IL-23a | Forward | ACCTGTAGTGGTGGTGGTGGAG |
| Reverse | GGACCAGATAACTGTTGGCAGAGC |
| IL-10 | Forward | AGTGTGTATTGAGTCTGCTGG |
| Reverse | TTTCCAAGGAGTTGTTTCCG |
| TGF-β1 | Forward | GCCATGAGCGGTCCATCACG |
| Reverse | CAGTCAGCATCCACGCACCAC |
| ROR-γt | Forward | TCCACTACGGGGTTATCACCT |
| Reverse | AGTAGGCCACATTACACTGCT |
| SOCS3 | Forward | CTGCTCTTACGACCGCTGTCTCG |
| Reverse | ATGTTGGCAGCCGTGAAGTCTAC |
| GAPDH | Forward | AATGGATTTGGACGCATTGGT |
| Reverse | TTTGCACTGGTACGTGTTGAT |

Table S1. Oligonucleotide primer sequences for qRT-PCR.
